# Supplementary material for: Improving acute cardiac transplantation rejection therapy using ultrasound-targeted FK506-loaded microbubbles in rats
Source: Royal Society of Chemistry journal article supplement (doi:10.1039/c9bm00301k), 2019-01-01
Supplement: c9bm00301k1.pdf [file c9bm00301k1.pdf]

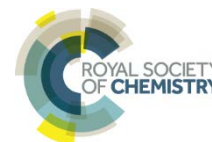

Journal Name

ARTICLE

**Electronic Supplementary Information (ESI)**

**Improving Acute Cardiac Transplantation Rejection Therapy by Ultrasound-Targeted FK506-Loaded Microbubbles in Rats**

Jie Liu,<sup>†,a,b</sup> Yihan Chen,<sup>†,a,b</sup> Guohua Wang,<sup>c</sup> Qiaofeng Jin,<sup>a,b</sup> Zhenxing Sun,<sup>a,b</sup> Qing Lv,<sup>a,b</sup> Jing Wang,<sup>a,b</sup> Yali Yang,<sup>a,b</sup> Li Zhang<sup>\*,a,b</sup> and Mingxing Xie<sup>\*,a,b</sup>

<sup>a</sup> Department of Ultrasound, Union Hospital, Tongji Medical College, Huazhong University of Science and Technology, Wuhan 430022, China

<sup>b</sup> Hubei Province Key Laboratory of Molecular Imaging

<sup>c</sup> Department of Cardiovascular Surgery, Union Hospital, Tongji Medical College, Huazhong University of Science and Technology, Wuhan 430022, China

† These authors contributed equally to this work

\* Corresponding authors:

Li Zhang, M.D, Ph.D, 1277 Jiefang Avenue, Wuhan 430022, China; E-mail: zli429@hust.edu.cn; Telephone number: +86 27 85726386; Fax number: +86 27 85779734

Mingxing Xie, M.D, Ph.D, 1277 Jiefang Avenue, Wuhan 430022, China; E-mail: xiemx@hust.edu.cn; Telephone number: +86 27 85726386; Fax number: +86 27 85779734

## Supplementary information

### S1. *In vivo* stability of FK506-MBs

We evaluated the lifetime of the FK506-MBs *in vivo* by evaluating their echo intensity in heart tissues, using a commercial ultrasound system IU22 (Philips Medical Systems, Amsterdam, Netherlands) using a L12-5 linear array transducer. FK506-MBs and blank MBs were diluted to the same concentration ( $5 \times 10^7$  MBs/mL) with 0.9% normal saline. After separately bolus injection of  $5 \times 10^7$  MBs via the tail vein, the time–intensity curve (TIC) was obtained. The lifetime of the FK506-MBs and blank MBs *in vivo* was then estimated by the clearance time. All data were analysed with Q-Lab software (Philips Medical Systems, Amsterdam, Netherlands).

### S2. Safety evaluation of MBs and UTMD

To further illustrate the safety of MBs and UTMD, a total of 27 rats were randomly divided into three groups: (1) PBS group: rats were only injected with PBS; (2) MBs group: rats were only injected with  $5 \times 10^8$  MBs; (3) UTMD group: rats were injected with  $5 \times 10^8$  MBs and combined with ultrasound, the ultrasound probe (Sonitron 2000 V, Japan) was placed at the heart. The parameters of UTMD were ultrasound frequency = 1 MHz; duty cycle = 50%; ultrasound intensity =  $2 \text{ w/cm}^2$ ; irradiation time = 2 min. Blood samples and major organs of three rats in each group were collected after treatment 30 min, 1 day and 7 days. Serum biochemical indexes including lactic dehydrogenase 1 (LDH1), creatine kinase (CK), alanine aminotransferase (ALT), aspartate aminotransferase (AST), creatinine (Cr) and blood urea nitrogen (BUN) and complete blood count were measured and analysed. Additionally, major organs were HE stained.

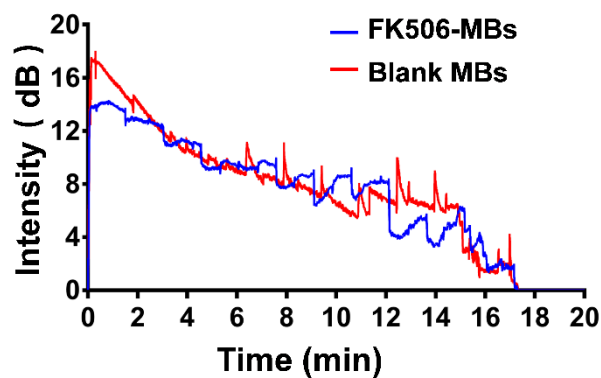

**Fig. S1.** *In vivo* lifetime of FK506-MBs and blank MBs measured from backscattered ultrasound intensity within heart.

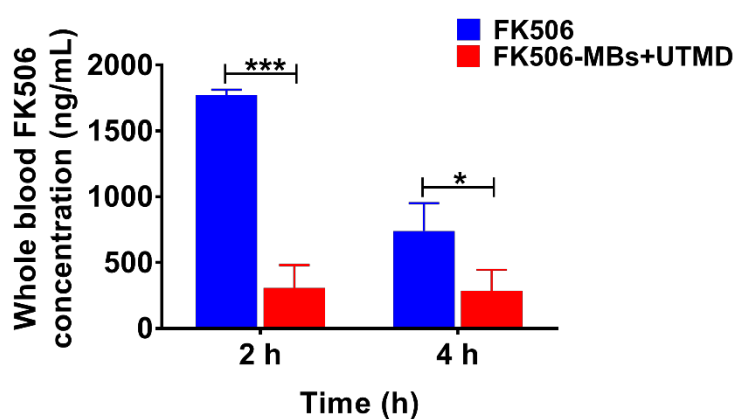

**Fig. S2.** The concentration of FK506 in whole blood were evaluated at 2 h and 4 h after administration. ( $n = 6$ ),  $*P < 0.05$ ,  $***P < 0.001$ .

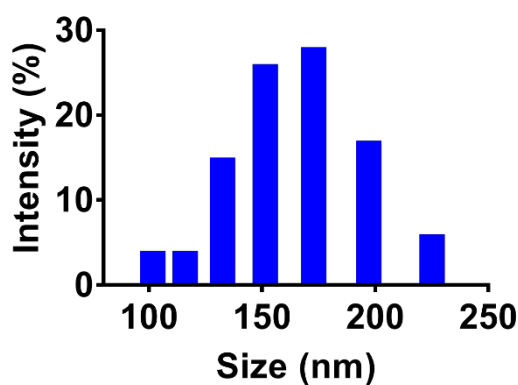

**Fig. S3.** Size distribution of FK506-MBs after UTMD.

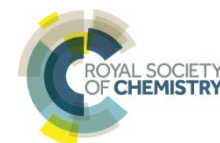

## Journal Name

## ARTICLE

**Table. S1.** Complete blood count analysis (mean  $\pm$  SEM) (n = 3)

|                          | PBS              |                  |                  | MB               |                  |                  | UTMD            |                 |                 |
|--------------------------|------------------|------------------|------------------|------------------|------------------|------------------|-----------------|-----------------|-----------------|
|                          | 30 min           | 1 day            | 7 day            | 30 min           | 1 day            | 7 day            | 30 min          | 1 day           | 7day            |
| WBC ( $10^9/L$ )         | 6.63 $\pm$ 0.21  | 6.43 $\pm$ 0.21  | 6.43 $\pm$ 0.20  | 6.36 $\pm$ 0.17  | 6.56 $\pm$ 0.18  | 6.66 $\pm$ 0.12  | 6.7 $\pm$ 0.11  | 6.63 $\pm$ 0.08 | 6.66 $\pm$ 0.14 |
| Lymphocyte ( $10^9/L$ )  | 4.80 $\pm$ 0.37  | 4.80 $\pm$ 0.20  | 4.86 $\pm$ 0.46  | 4.76 $\pm$ 0.29  | 5.00 $\pm$ 0.05  | 4.76 $\pm$ 0.16  | 4.73 $\pm$ 0.14 | 4.90 $\pm$ 0.15 | 4.70 $\pm$ 0.17 |
| Monocyte ( $10^9/L$ )    | 0.2 $\pm$ 0.01   | 0.21 $\pm$ 0.02  | 0.22 $\pm$ 0.01  | 0.196 $\pm$ 0.01 | 0.19 $\pm$ 0.01  | 0.19 $\pm$ 0.01  | 0.18 $\pm$ 0.01 | 0.21 $\pm$ 0.01 | 0.20 $\pm$ 0.02 |
| Neutrophils ( $10^9/L$ ) | 1.8 $\pm$ 0.37   | 1.83 $\pm$ 0.31  | 1.9 $\pm$ 0.35   | 2.26 $\pm$ 0.31  | 2.30 $\pm$ 0.25  | 2.03 $\pm$ 0.31  | 2.33 $\pm$ 0.29 | 1.93 $\pm$ 0.29 | 2.10 $\pm$ 0.26 |
| RBC ( $10^{12}/L$ )      | 5.67 $\pm$ 0.26  | 5.79 $\pm$ 0.43  | 5.84 $\pm$ 0.29  | 5.71 $\pm$ 0.34  | 5.72 $\pm$ 0.35  | 5.77 $\pm$ 0.29  | 5.84 $\pm$ 0.19 | 5.67 $\pm$ 0.35 | 5.89 $\pm$ 0.32 |
| PLT ( $10^9/L$ )         | 1232 $\pm$ 140.5 | 1297 $\pm$ 89.87 | 1263 $\pm$ 109.7 | 1341 $\pm$ 98.97 | 1269 $\pm$ 83.73 | 1300 $\pm$ 118.4 | 1410 $\pm$ 77   | 1390 $\pm$ 98   | 1352 $\pm$ 132  |

WBC, white blood cell; RBC, red blood cell; PLT, platelets

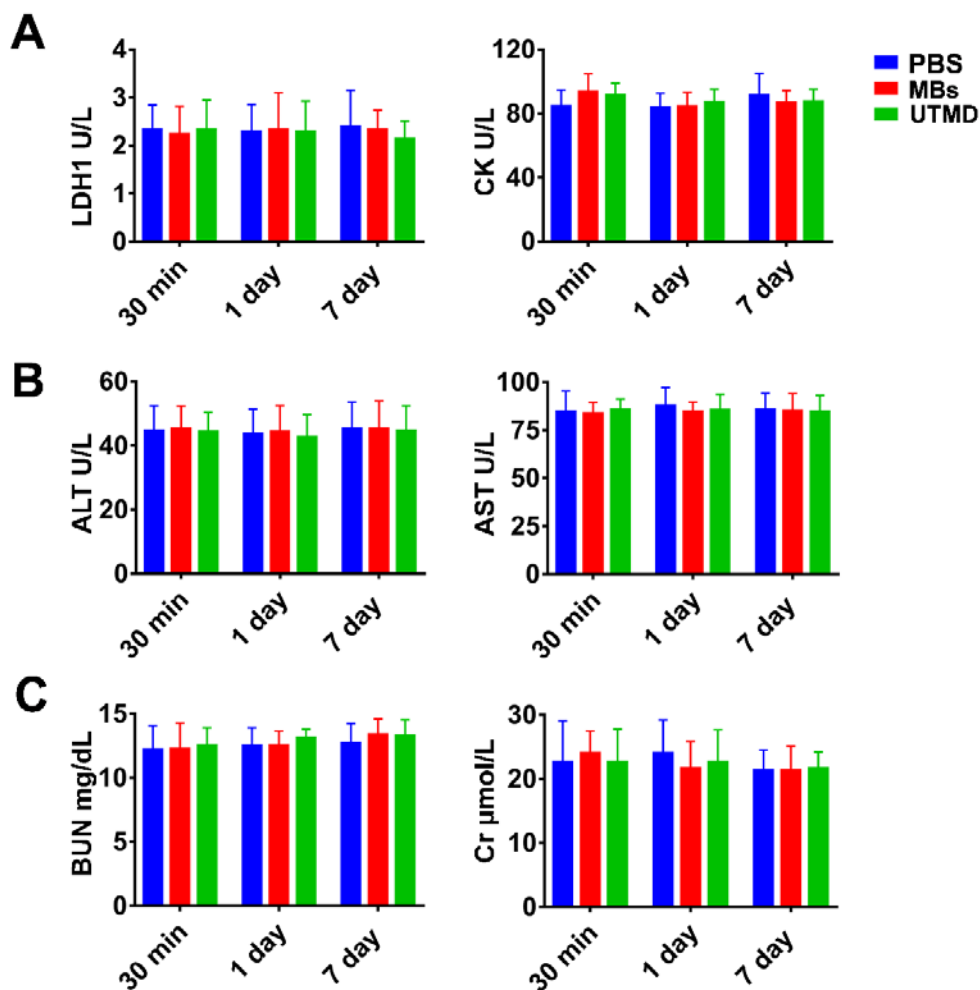

**Fig. S4.** Serum biochemical indexes analysis. (A) Serum biochemical indexes of LDH1 and CK. (B) Serum biochemical indexes of ALT and AST. (C) Serum biochemical indexes of BUN and Cr.

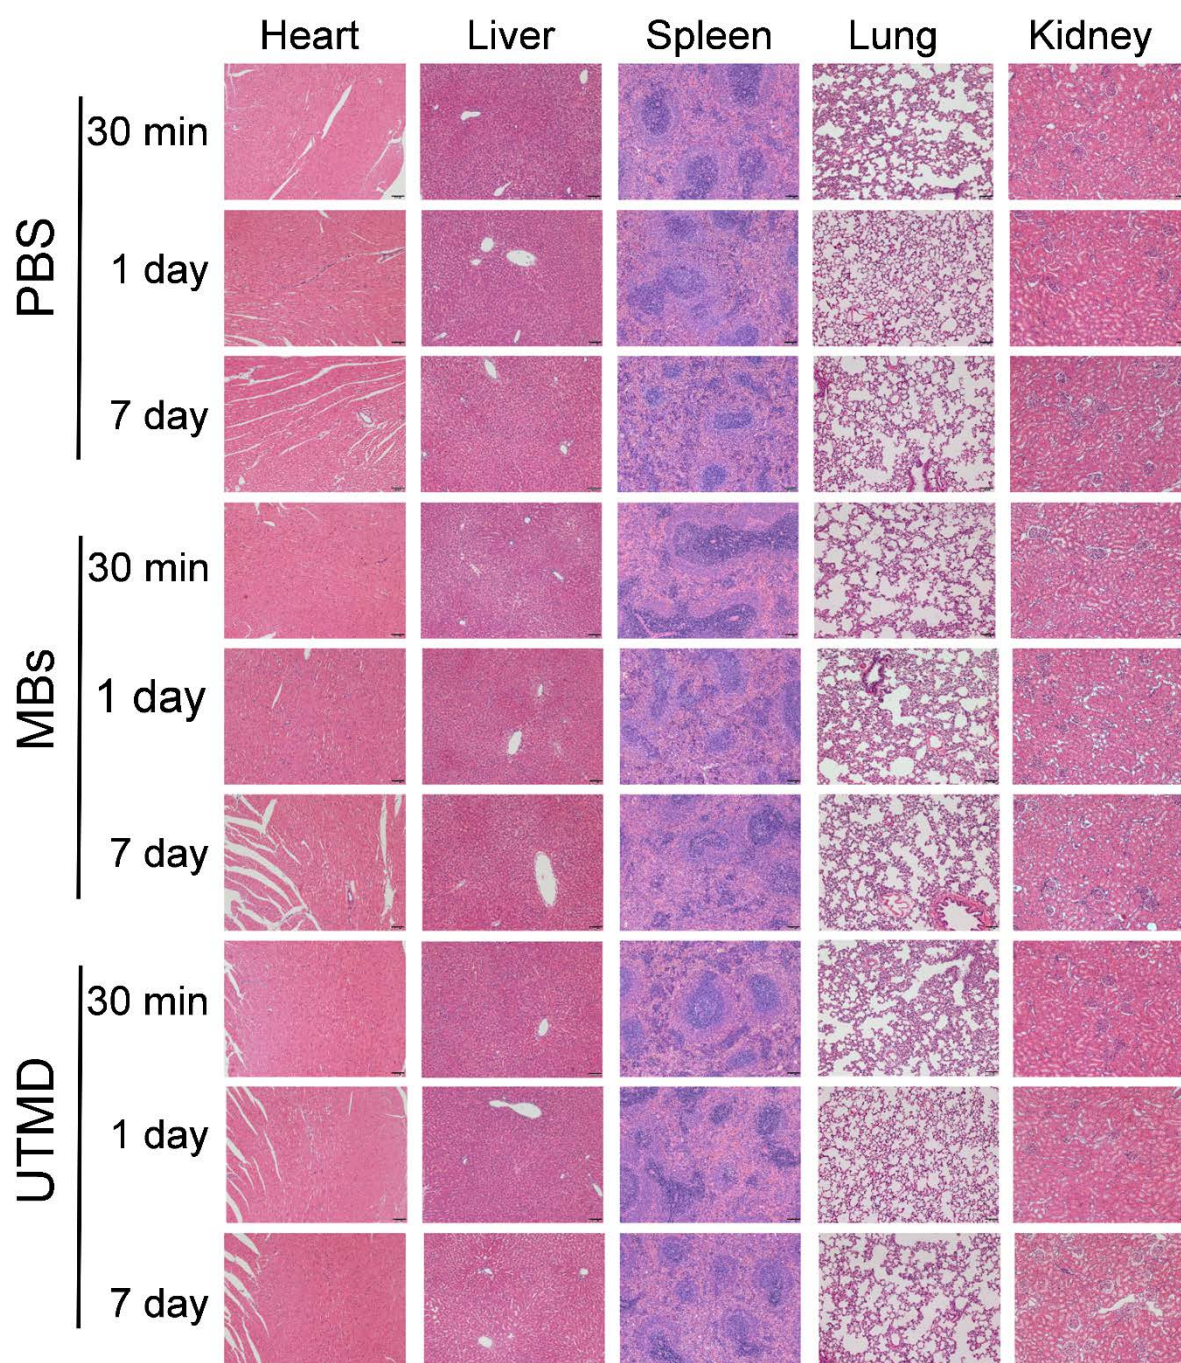

**Fig. S5.** Representative H&E stained sections of major organs obtained at 30 min, day 1 and day 7 after injection of PBS, MBs and treatment with UTMD respectively. Scale bar = 100  $\mu$ m.
